# Supplementary material for: Relationship among symptoms, quality of life, and complementary and alternative medicines use among patients undergoing hemodialysis in French-speaking Switzerland
Source: PubMed Central journal article supplement (PMC10230675; doi:10.1186/s12906-023-04001-z), 2023-05-31
Supplement: 12906_2023_4001_MOESM1_ESM.pdf [file 12906_2023_4001_MOESM1_ESM.pdf]

# **Section 1 – sociodemographic data**

(Authors' translation from French)

Identification code : \_\_\_\_\_

Date : \_\_\_\_\_

- 1) What's your age ? \_\_\_\_\_  I refuse to answer
- 2) What's your sex ?  
 Male  
 Female  I refuse to answer
- 3) What's your civil status?  
 Single  
 Married  
 Widow  
 Separated  
 Living in a free union  I refuse to answer
- 4) What's your activity status?  
 Active work percentage: \_\_\_\_\_ %  
 Retired  
 Unemployed  
 Other inactive  I refuse to answer
- 5) Do you have any child?  
 Yes  
 No  I refuse to answer
- If yes, how many are currently leaving with you?  
\_\_\_\_\_  I refuse to answer
- 6) Are you a smoker?  
 Non-smoker  
 Former smoker  
 Current smoker  I refuse to answer
- 7) How long have you been on dialysis ?  
\_\_\_\_\_ months  I don't know  I refuse to answer
- 8) Have you ever used another method of dialysis?  
 Yes  
 No  I don't know  I refuse to answer
- 9) If yes, which type of dialysis have you used?  
 Peritoneal dialysis  
 Home Hemodialysis  I don't know  I refuse to answer

10) Would you like to have a renal transplantation in the future?

Yes

No

I don't know

I refuse to answer

11) Are you assuming any of the following product (multiple answers are possible)?

Antihypertensive drugs

Vitamin supplements

Iron supplements

Pain killers

Antidepressants

Other

I don't know

I refuse to answer

12) Are you currently suffering from one of these conditions?

Heart insufficiency

Yes

No

I don't know

I refuse to answer

Hypertension

Yes

No

I don't know

I refuse to answer

Diabetes

Yes

No

I don't know

I refuse to answer

Chronic obstructive pulmonary disease (COPD)

Yes

No

I don't know

I refuse to answer

Arrhythmia

Yes

No

I don't know

I refuse to answer

Lower limbs arteritis

Yes

No

I don't know

I refuse to answer

Cancer

Yes

No

I don't know

I refuse to answer

Hepatitis

Yes

No

I don't know

I refuse to answer

## Section 2 – dialysis symptom index

(from :

Weisbord, S. D., Fried, L. F., Arnold, R. M., Rotondi, A. J., Fine, M. J., Levenson, D. J., & Switzer, G. E. (2004). Development of a symptom assessment instrument for chronic hemodialysis patients: the Dialysis Symptom Index. *Journal of pain and symptom management*, 27(3), 226–240.  
<https://doi.org/10.1016/j.jpainsymman.2003.07.004>)

## Appendix

**Dialysis Symptom Index****Instructions**

Below is a list of physical and emotional symptoms that people on dialysis may have. For each symptom, please indicate if you had the symptom during the past week by circling "yes" or "no." If "yes," please indicate how much that symptom bothered you by circling the appropriate number.

| <i>During the past week:<br/>Did you experience this<br/>symptom?</i> |       | <i>If "yes":<br/>How much did it <u>bother</u> you?</i> |                             |                       |                        |                      |
|-----------------------------------------------------------------------|-------|---------------------------------------------------------|-----------------------------|-----------------------|------------------------|----------------------|
|                                                                       |       | <b>Not<br/>At All</b>                                   | <b>A<br/>Little<br/>Bit</b> | <b>Some-<br/>what</b> | <b>Quite<br/>a Bit</b> | <b>Very<br/>Much</b> |
| 1. Constipation                                                       | NO    |                                                         |                             |                       |                        |                      |
|                                                                       | YES → | 0                                                       | 1                           | 2                     | 3                      | 4                    |
| 2. Nausea                                                             | NO    |                                                         |                             |                       |                        |                      |
|                                                                       | YES → | 0                                                       | 1                           | 2                     | 3                      | 4                    |
| 3. Vomiting                                                           | NO    |                                                         |                             |                       |                        |                      |
|                                                                       | YES → | 0                                                       | 1                           | 2                     | 3                      | 4                    |
| 4. Diarrhea                                                           | NO    |                                                         |                             |                       |                        |                      |
|                                                                       | YES → | 0                                                       | 1                           | 2                     | 3                      | 4                    |
| 5. Decreased appetite                                                 | NO    |                                                         |                             |                       |                        |                      |
|                                                                       | YES → | 0                                                       | 1                           | 2                     | 3                      | 4                    |
| 6. Muscle cramps                                                      | NO    |                                                         |                             |                       |                        |                      |
|                                                                       | YES → | 0                                                       | 1                           | 2                     | 3                      | 4                    |
| 7. Swelling in legs                                                   | NO    |                                                         |                             |                       |                        |                      |
|                                                                       | YES → | 0                                                       | 1                           | 2                     | 3                      | 4                    |
| 8. Shortness of breath                                                | NO    |                                                         |                             |                       |                        |                      |
|                                                                       | YES → | 0                                                       | 1                           | 2                     | 3                      | 4                    |
| 9. Lightheadedness or<br>dizziness                                    | NO    |                                                         |                             |                       |                        |                      |
|                                                                       | YES → | 0                                                       | 1                           | 2                     | 3                      | 4                    |

| <b>During the past week:<br/>Did you experience this<br/>symptom?</b> |       | <b>If "yes":<br/>How much did it <u>bother</u> you?</b> |                             |                       |                        |                      |
|-----------------------------------------------------------------------|-------|---------------------------------------------------------|-----------------------------|-----------------------|------------------------|----------------------|
|                                                                       |       | <b>Not<br/>At All</b>                                   | <b>A<br/>Little<br/>Bit</b> | <b>Some-<br/>what</b> | <b>Quite<br/>a Bit</b> | <b>Very<br/>Much</b> |
| 10. Restless legs or<br>difficulty keeping<br>legs still              | NO    | 0                                                       | 1                           | 2                     | 3                      | 4                    |
|                                                                       | YES → |                                                         |                             |                       |                        |                      |
| 11. Numbness or<br>tingling in feet                                   | NO    | 0                                                       | 1                           | 2                     | 3                      | 4                    |
|                                                                       | YES → |                                                         |                             |                       |                        |                      |
| 12. Feeling tired or lack<br>of energy                                | NO    | 0                                                       | 1                           | 2                     | 3                      | 4                    |
|                                                                       | YES → |                                                         |                             |                       |                        |                      |
| 13. Cough                                                             | NO    | 0                                                       | 1                           | 2                     | 3                      | 4                    |
|                                                                       | YES → |                                                         |                             |                       |                        |                      |
| 14. Dry mouth                                                         | NO    | 0                                                       | 1                           | 2                     | 3                      | 4                    |
|                                                                       | YES → |                                                         |                             |                       |                        |                      |
| 15. Bone or joint pain                                                | NO    | 0                                                       | 1                           | 2                     | 3                      | 4                    |
|                                                                       | YES → |                                                         |                             |                       |                        |                      |
| 16. Chest pain                                                        | NO    | 0                                                       | 1                           | 2                     | 3                      | 4                    |
|                                                                       | YES → |                                                         |                             |                       |                        |                      |
| 17. Headache                                                          | NO    | 0                                                       | 1                           | 2                     | 3                      | 4                    |
|                                                                       | YES → |                                                         |                             |                       |                        |                      |
| 18. Muscle soreness                                                   | NO    | 0                                                       | 1                           | 2                     | 3                      | 4                    |
|                                                                       | YES → |                                                         |                             |                       |                        |                      |
| 19. Difficulty<br>concentrating                                       | NO    | 0                                                       | 1                           | 2                     | 3                      | 4                    |
|                                                                       | YES → |                                                         |                             |                       |                        |                      |
| 20. Dry skin                                                          | NO    | 0                                                       | 1                           | 2                     | 3                      | 4                    |
|                                                                       | YES → |                                                         |                             |                       |                        |                      |
| 21. Itching                                                           | NO    | 0                                                       | 1                           | 2                     | 3                      | 4                    |
|                                                                       | YES → |                                                         |                             |                       |                        |                      |
| 22. Worrying                                                          | NO    | 0                                                       | 1                           | 2                     | 3                      | 4                    |
|                                                                       | YES → |                                                         |                             |                       |                        |                      |

| <i>During the past week:<br/>Did you experience this<br/>symptom?</i> |       | <i>If "yes":<br/>How much did it <u>bother</u> you?</i> |                             |                       |                        |                      |
|-----------------------------------------------------------------------|-------|---------------------------------------------------------|-----------------------------|-----------------------|------------------------|----------------------|
|                                                                       |       | <b>Not<br/>At All</b>                                   | <b>A<br/>Little<br/>Bit</b> | <b>Some<br/>-what</b> | <b>Quite<br/>a Bit</b> | <b>Very<br/>Much</b> |
| 23. Feeling nervous                                                   | NO    |                                                         |                             |                       |                        |                      |
|                                                                       | YES → | 0                                                       | 1                           | 2                     | 3                      | 4                    |
| 24. Trouble falling<br>asleep                                         | NO    |                                                         |                             |                       |                        |                      |
|                                                                       | YES → | 0                                                       | 1                           | 2                     | 3                      | 4                    |
| 25. Trouble staying<br>asleep                                         | NO    |                                                         |                             |                       |                        |                      |
|                                                                       | YES → | 0                                                       | 1                           | 2                     | 3                      | 4                    |
| 26. Feeling irritable                                                 | NO    |                                                         |                             |                       |                        |                      |
|                                                                       | YES → | 0                                                       | 1                           | 2                     | 3                      | 4                    |
| 27. Feeling sad                                                       | NO    |                                                         |                             |                       |                        |                      |
|                                                                       | YES → | 0                                                       | 1                           | 2                     | 3                      | 4                    |
| 28. Feeling anxious                                                   | NO    |                                                         |                             |                       |                        |                      |
|                                                                       | YES → | 0                                                       | 1                           | 2                     | 3                      | 4                    |
| 29. Decreased interest<br>in sex                                      | NO    |                                                         |                             |                       |                        |                      |
|                                                                       | YES → | 0                                                       | 1                           | 2                     | 3                      | 4                    |
| 30. Difficulty becoming<br>sexually aroused                           | NO    |                                                         |                             |                       |                        |                      |
|                                                                       | YES → | 0                                                       | 1                           | 2                     | 3                      | 4                    |

Are there any other symptoms not mentioned on this questionnaire that you have experienced during the past week? \_\_\_\_\_

The University of Pittsburgh Medical Center

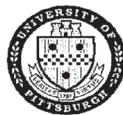

VA Pittsburgh Healthcare System



# Section 3 – WHOQOL-BREF

(from :

<https://www.who.int/tools/whoqol/whoqol-bref>)

**Appendix III: Australian WHOQOL-BREF**

**WORLD HEALTH ORGANISATION  
QUALITY OF LIFE**

**WHOQOL- BREF  
Australian Version (May 2000)**

**Instructions:**

This assessment asks how you feel about your quality of life, health, and other areas of your life. Please answer all the questions. If you are unsure about which response to give to a question, please choose the one that appears most appropriate. This can often be your first response.

Please keep in mind your standards, hopes, pleasures and concerns. We ask that you think about your life in the **last two weeks**.

| <b>Do you get the kind of support from others that you need?</b> |               |                 |           |                 |
|------------------------------------------------------------------|---------------|-----------------|-----------|-----------------|
| Not at all<br>1                                                  | Slightly<br>2 | Moderately<br>3 | Very<br>④ | Completely<br>5 |

You would circle the number 4 if in the last two weeks you got a great deal of support from others.

If you did not get any of the support from others that you needed in the last two weeks you would circle 1.

Thank you for your help.

Now turn to the back of this page

Please read the question, assess your feelings, for the last two weeks, and circle the number on the scale for each question that gives the best answer for you.

|   |                                          | Very poor | Poor | Neither poor nor good | Good | Very good |
|---|------------------------------------------|-----------|------|-----------------------|------|-----------|
| 1 | How would you rate your quality of life? | 1         | 2    | 3                     | 4    | 5         |

|   |                                         | Very dissatisfied | Fairly Dissatisfied | Neither satisfied nor dissatisfied | Satisfied | Very satisfied |
|---|-----------------------------------------|-------------------|---------------------|------------------------------------|-----------|----------------|
| 2 | How satisfied are you with your health? | 1                 | 2                   | 3                                  | 4         | 5              |

The following questions ask about how much you have experienced certain things in the **last two weeks**.

|   |                                                                                            | Not at all | A Small amount | A Moderate amount | A great deal | An Extreme amount |
|---|--------------------------------------------------------------------------------------------|------------|----------------|-------------------|--------------|-------------------|
| 3 | To what extent do you feel that physical pain prevents you from doing what you need to do? | 1          | 2              | 3                 | 4            | 5                 |
| 4 | How much do you need any medical treatment to function in your daily life?                 | 1          | 2              | 3                 | 4            | 5                 |
| 5 | How much do you enjoy life?                                                                | 1          | 2              | 3                 | 4            | 5                 |
| 6 | To what extent do you feel your life to be meaningful?                                     | 1          | 2              | 3                 | 4            | 5                 |

|   |                                           | Not at all | Slightly | Moderately | Very | Extremely |
|---|-------------------------------------------|------------|----------|------------|------|-----------|
| 7 | How well are you able to concentrate?     | 1          | 2        | 3          | 4    | 5         |
| 8 | How safe do you feel in your daily life?  | 1          | 2        | 3          | 4    | 5         |
| 9 | How healthy is your physical environment? | 1          | 2        | 3          | 4    | 5         |

|    |                                                                      | Not at all | Slightly | Somewhat | To a great extent | Completely |
|----|----------------------------------------------------------------------|------------|----------|----------|-------------------|------------|
| 10 | Do you have enough energy for everyday life?                         | 1          | 2        | 3        | 4                 | 5          |
| 11 | Are you able to accept your bodily appearance?                       | 1          | 2        | 3        | 4                 | 5          |
| 12 | Have you enough money to meet your needs?                            | 1          | 2        | 3        | 4                 | 5          |
| 13 | How available to you is the information you need in your daily life? | 1          | 2        | 3        | 4                 | 5          |
| 14 | To what extent do you have the opportunity for leisure activities?   | 1          | 2        | 3        | 4                 | 5          |

|    |                                                 | Not at all | Slightly | Moderately | Very | Extremely |
|----|-------------------------------------------------|------------|----------|------------|------|-----------|
| 15 | How well are you able to get around physically? | 1          | 2        | 3          | 4    | 5         |

The following questions ask you to say how good or satisfied you have felt about various aspects of your life over the **last two weeks**.

|    |                                                                                  | Very Dissatisfied | Fairly Dissatisfied | Neither Satisfied nor Dissatisfied | Satisfied | Very satisfied |
|----|----------------------------------------------------------------------------------|-------------------|---------------------|------------------------------------|-----------|----------------|
| 16 | How satisfied are you with your sleep?                                           | 1                 | 2                   | 3                                  | 4         | 5              |
| 17 | How satisfied are you with your ability to perform your daily living activities? | 1                 | 2                   | 3                                  | 4         | 5              |
| 18 | How satisfied are you with your capacity for work                                | 1                 | 2                   | 3                                  | 4         | 5              |
| 19 | How satisfied are you with yourself?                                             | 1                 | 2                   | 3                                  | 4         | 5              |
| 20 | How satisfied are you with your personal relationships?                          | 1                 | 2                   | 3                                  | 4         | 5              |

|    |                                                                   |   |   |   |   |   |
|----|-------------------------------------------------------------------|---|---|---|---|---|
| 21 | How satisfied are you with your sex life?                         | 1 | 2 | 3 | 4 | 5 |
| 22 | How satisfied are you with the support you get from your friends? | 1 | 2 | 3 | 4 | 5 |
| 23 | How satisfied are you with the conditions of your living place?   | 1 | 2 | 3 | 4 | 5 |
| 24 | How satisfied are you with your access to health services?        | 1 | 2 | 3 | 4 | 5 |
| 25 | How satisfied are you with your transport?                        | 1 | 2 | 3 | 4 | 5 |

The following question refers to **how often** you have felt or experienced certain things in the last two weeks.

|    |                                                                                            | Never | Infrequently | Sometimes | Frequently | Always |
|----|--------------------------------------------------------------------------------------------|-------|--------------|-----------|------------|--------|
| 26 | How often do you have negative feelings such as blue mood, despair, anxiety or depression? | 1     | 2            | 3         | 4          | 5      |

**THE END**

This translation was not created by the World Health Organization (WHO). WHO is not responsible for the content or accuracy of this translation. In the event of any inconsistency between the English and the translated version, the original English version shall be the binding and authentic version.

## Section 4 – I-CAM-Q

(from :

Quandt, S. A., Verhoef, M. J., Arcury, T. A., Lewith, G. T., Steinsbekk, A., Kristoffersen, A. E., Wahner-Roedler, D. L., & Fønnebø, V. (2009). Development of an international questionnaire to measure use of complementary and alternative medicine (I-CAM-Q). *Journal of alternative and complementary medicine (New York, N.Y.)*, 15(4), 331–339. <https://doi.org/10.1089/acm.2008.0521>)



## Appendix

### NAFKAM International CAM Questionnaire (I-CAM-Q): RECOMMENDED FOR USE IN STUDIES OF COMPLEMENTARY AND ALTERNATIVE MEDICINE (CAM) -- Self-Administered Version

**1. Visiting health care providers:** Health problems may be attended to by a variety of complementary and conventional health care providers.

| Have you seen any of the following providers in the last 12 months? | Yes<br>No                |                          | Number of times you saw this provider in the last 3 months? | Please indicate the <u>main</u> reason you <u>last</u> saw the provider (Check only one). |                                                                                             |                          |                                         | How helpful was it for you to see this provider? (Check only one) |                          |                          |                          |
|---------------------------------------------------------------------|--------------------------|--------------------------|-------------------------------------------------------------|-------------------------------------------------------------------------------------------|---------------------------------------------------------------------------------------------|--------------------------|-----------------------------------------|-------------------------------------------------------------------|--------------------------|--------------------------|--------------------------|
|                                                                     |                          |                          |                                                             | For an acute illness/condition, one that lasted less than one month                       | To treat a long-term health condition (one that lasted more than one month) or its symptoms | To improve well-being    | Other (Please specify the other reason) | Very                                                              | Somewhat                 | Not at all               | Don't know               |
| <b>Physician</b>                                                    | <input type="checkbox"/> | <input type="checkbox"/> | ___                                                         | <input type="checkbox"/>                                                                  | <input type="checkbox"/>                                                                    | <input type="checkbox"/> | _____                                   | <input type="checkbox"/>                                          | <input type="checkbox"/> | <input type="checkbox"/> | <input type="checkbox"/> |
| <b>Chiropractor</b>                                                 | <input type="checkbox"/> | <input type="checkbox"/> | ___                                                         | <input type="checkbox"/>                                                                  | <input type="checkbox"/>                                                                    | <input type="checkbox"/> | _____                                   | <input type="checkbox"/>                                          | <input type="checkbox"/> | <input type="checkbox"/> | <input type="checkbox"/> |
| <b>Homeopath</b>                                                    | <input type="checkbox"/> | <input type="checkbox"/> | ___                                                         | <input type="checkbox"/>                                                                  | <input type="checkbox"/>                                                                    | <input type="checkbox"/> | _____                                   | <input type="checkbox"/>                                          | <input type="checkbox"/> | <input type="checkbox"/> | <input type="checkbox"/> |
| <b>Acupuncturist</b>                                                | <input type="checkbox"/> | <input type="checkbox"/> | ___                                                         | <input type="checkbox"/>                                                                  | <input type="checkbox"/>                                                                    | <input type="checkbox"/> | _____                                   | <input type="checkbox"/>                                          | <input type="checkbox"/> | <input type="checkbox"/> | <input type="checkbox"/> |
| <b>Herbalist</b>                                                    | <input type="checkbox"/> | <input type="checkbox"/> | ___                                                         | <input type="checkbox"/>                                                                  | <input type="checkbox"/>                                                                    | <input type="checkbox"/> | _____                                   | <input type="checkbox"/>                                          | <input type="checkbox"/> | <input type="checkbox"/> | <input type="checkbox"/> |
| <b>Spiritual healer</b>                                             | <input type="checkbox"/> | <input type="checkbox"/> | ___                                                         | <input type="checkbox"/>                                                                  | <input type="checkbox"/>                                                                    | <input type="checkbox"/> | _____                                   | <input type="checkbox"/>                                          | <input type="checkbox"/> | <input type="checkbox"/> | <input type="checkbox"/> |
| <b>Specified option:</b><br>_____                                   | <input type="checkbox"/> | <input type="checkbox"/> | ___                                                         | <input type="checkbox"/>                                                                  | <input type="checkbox"/>                                                                    | <input type="checkbox"/> | _____                                   | <input type="checkbox"/>                                          | <input type="checkbox"/> | <input type="checkbox"/> | <input type="checkbox"/> |
| <b>Other (please specify):</b><br>_____                             | <input type="checkbox"/> | <input type="checkbox"/> | ___                                                         | <input type="checkbox"/>                                                                  | <input type="checkbox"/>                                                                    | <input type="checkbox"/> | _____                                   | <input type="checkbox"/>                                          | <input type="checkbox"/> | <input type="checkbox"/> | <input type="checkbox"/> |
| <b>Other (please specify):</b><br>_____                             | <input type="checkbox"/> | <input type="checkbox"/> | ___                                                         | <input type="checkbox"/>                                                                  | <input type="checkbox"/>                                                                    | <input type="checkbox"/> | _____                                   | <input type="checkbox"/>                                          | <input type="checkbox"/> | <input type="checkbox"/> | <input type="checkbox"/> |

## 2. Complementary treatments received from physicians (MDs)

If you have not seen a physician in the past 12 months, please go to question 3.

Some physicians provide complementary, as well as conventional treatments

| Have you received any of the following complementary treatments from a physician in the last 12 months? | Yes<br>No                                         | Number of times you received this treatment in the last 3 months? | Please indicate the <u>main</u> reason you <u>last</u> received this treatment (Check only <i>one</i> ). |                                                                                             |                          | How helpful was it to receive treatment from the physician? (Check only one) |                                                                                                     |
|---------------------------------------------------------------------------------------------------------|---------------------------------------------------|-------------------------------------------------------------------|----------------------------------------------------------------------------------------------------------|---------------------------------------------------------------------------------------------|--------------------------|------------------------------------------------------------------------------|-----------------------------------------------------------------------------------------------------|
|                                                                                                         |                                                   |                                                                   | For an acute illness/condition, one that lasted less than one month                                      | To treat a long-term health condition (one that lasted more than one month) or its symptoms | To improve well-being    |                                                                              | Other (Please specify the other reason)                                                             |
| <b>Manipulation</b>                                                                                     | <input type="checkbox"/> <input type="checkbox"/> | _____                                                             | <input type="checkbox"/>                                                                                 | <input type="checkbox"/>                                                                    | <input type="checkbox"/> | _____                                                                        | <input type="checkbox"/> <input type="checkbox"/> <input type="checkbox"/> <input type="checkbox"/> |
| <b>Homeopathy</b>                                                                                       | <input type="checkbox"/> <input type="checkbox"/> | _____                                                             | <input type="checkbox"/>                                                                                 | <input type="checkbox"/>                                                                    | <input type="checkbox"/> | _____                                                                        | <input type="checkbox"/> <input type="checkbox"/> <input type="checkbox"/> <input type="checkbox"/> |
| <b>Acupuncture</b>                                                                                      | <input type="checkbox"/> <input type="checkbox"/> | _____                                                             | <input type="checkbox"/>                                                                                 | <input type="checkbox"/>                                                                    | <input type="checkbox"/> | _____                                                                        | <input type="checkbox"/> <input type="checkbox"/> <input type="checkbox"/> <input type="checkbox"/> |
| <b>Herbs</b>                                                                                            | <input type="checkbox"/> <input type="checkbox"/> | _____                                                             | <input type="checkbox"/>                                                                                 | <input type="checkbox"/>                                                                    | <input type="checkbox"/> | _____                                                                        | <input type="checkbox"/> <input type="checkbox"/> <input type="checkbox"/> <input type="checkbox"/> |
| <b>Spiritual healing</b>                                                                                | <input type="checkbox"/> <input type="checkbox"/> | _____                                                             | <input type="checkbox"/>                                                                                 | <input type="checkbox"/>                                                                    | <input type="checkbox"/> | _____                                                                        | <input type="checkbox"/> <input type="checkbox"/> <input type="checkbox"/> <input type="checkbox"/> |
| <b>Specified option:</b><br>_____                                                                       | <input type="checkbox"/> <input type="checkbox"/> | _____                                                             | <input type="checkbox"/>                                                                                 | <input type="checkbox"/>                                                                    | <input type="checkbox"/> | _____                                                                        | <input type="checkbox"/> <input type="checkbox"/> <input type="checkbox"/> <input type="checkbox"/> |
| <b>Other (please specify):</b><br>_____                                                                 | <input type="checkbox"/> <input type="checkbox"/> | _____                                                             | <input type="checkbox"/>                                                                                 | <input type="checkbox"/>                                                                    | <input type="checkbox"/> | _____                                                                        | <input type="checkbox"/> <input type="checkbox"/> <input type="checkbox"/> <input type="checkbox"/> |

**3. Use of Herbal Medicine and Dietary Supplements**, including tablets, capsules and liquids.

| For each category below, please list up to three products you have used in the last 12 months. | Do you currently use this product? |                          | Please indicate the <i>main</i> reason that applies to your <i>last</i> use (Check only one). |                                                                                             |                          |                        | How helpful did you find this product? (Check only one) |                          |                          |                          |
|------------------------------------------------------------------------------------------------|------------------------------------|--------------------------|-----------------------------------------------------------------------------------------------|---------------------------------------------------------------------------------------------|--------------------------|------------------------|---------------------------------------------------------|--------------------------|--------------------------|--------------------------|
|                                                                                                | Yes                                | No                       | For an acute illness/condition, one that lasted less than one month                           | To treat a long-term health condition (one that lasted more than one month) or its symptoms | To improve well-being    | Other (Please specify) | Very                                                    | Somewhat                 | Not at all               | Don't know               |
| <b>Herbs/Herbal Medicine</b>                                                                   |                                    |                          |                                                                                               |                                                                                             |                          |                        |                                                         |                          |                          |                          |
| _____                                                                                          | <input type="checkbox"/>           | <input type="checkbox"/> | <input type="checkbox"/>                                                                      | <input type="checkbox"/>                                                                    | <input type="checkbox"/> | _____                  | <input type="checkbox"/>                                | <input type="checkbox"/> | <input type="checkbox"/> | <input type="checkbox"/> |
| _____                                                                                          | <input type="checkbox"/>           | <input type="checkbox"/> | <input type="checkbox"/>                                                                      | <input type="checkbox"/>                                                                    | <input type="checkbox"/> | _____                  | <input type="checkbox"/>                                | <input type="checkbox"/> | <input type="checkbox"/> | <input type="checkbox"/> |
| _____                                                                                          | <input type="checkbox"/>           | <input type="checkbox"/> | <input type="checkbox"/>                                                                      | <input type="checkbox"/>                                                                    | <input type="checkbox"/> | _____                  | <input type="checkbox"/>                                | <input type="checkbox"/> | <input type="checkbox"/> | <input type="checkbox"/> |
| <b>Vitamins/Minerals</b>                                                                       |                                    |                          |                                                                                               |                                                                                             |                          |                        |                                                         |                          |                          |                          |
| _____                                                                                          | <input type="checkbox"/>           | <input type="checkbox"/> | <input type="checkbox"/>                                                                      | <input type="checkbox"/>                                                                    | <input type="checkbox"/> | _____                  | <input type="checkbox"/>                                | <input type="checkbox"/> | <input type="checkbox"/> | <input type="checkbox"/> |
| _____                                                                                          | <input type="checkbox"/>           | <input type="checkbox"/> | <input type="checkbox"/>                                                                      | <input type="checkbox"/>                                                                    | <input type="checkbox"/> | _____                  | <input type="checkbox"/>                                | <input type="checkbox"/> | <input type="checkbox"/> | <input type="checkbox"/> |
| _____                                                                                          | <input type="checkbox"/>           | <input type="checkbox"/> | <input type="checkbox"/>                                                                      | <input type="checkbox"/>                                                                    | <input type="checkbox"/> | _____                  | <input type="checkbox"/>                                | <input type="checkbox"/> | <input type="checkbox"/> | <input type="checkbox"/> |
| <b>Homeopathic remedies</b>                                                                    |                                    |                          |                                                                                               |                                                                                             |                          |                        |                                                         |                          |                          |                          |
| _____                                                                                          | <input type="checkbox"/>           | <input type="checkbox"/> | <input type="checkbox"/>                                                                      | <input type="checkbox"/>                                                                    | <input type="checkbox"/> | _____                  | <input type="checkbox"/>                                | <input type="checkbox"/> | <input type="checkbox"/> | <input type="checkbox"/> |
| _____                                                                                          | <input type="checkbox"/>           | <input type="checkbox"/> | <input type="checkbox"/>                                                                      | <input type="checkbox"/>                                                                    | <input type="checkbox"/> | _____                  | <input type="checkbox"/>                                | <input type="checkbox"/> | <input type="checkbox"/> | <input type="checkbox"/> |
| _____                                                                                          | <input type="checkbox"/>           | <input type="checkbox"/> | <input type="checkbox"/>                                                                      | <input type="checkbox"/>                                                                    | <input type="checkbox"/> | _____                  | <input type="checkbox"/>                                | <input type="checkbox"/> | <input type="checkbox"/> | <input type="checkbox"/> |
| <b>Other Supplements</b>                                                                       |                                    |                          |                                                                                               |                                                                                             |                          |                        |                                                         |                          |                          |                          |
| _____                                                                                          | <input type="checkbox"/>           | <input type="checkbox"/> | <input type="checkbox"/>                                                                      | <input type="checkbox"/>                                                                    | <input type="checkbox"/> | _____                  | <input type="checkbox"/>                                | <input type="checkbox"/> | <input type="checkbox"/> | <input type="checkbox"/> |
| _____                                                                                          | <input type="checkbox"/>           | <input type="checkbox"/> | <input type="checkbox"/>                                                                      | <input type="checkbox"/>                                                                    | <input type="checkbox"/> | _____                  | <input type="checkbox"/>                                | <input type="checkbox"/> | <input type="checkbox"/> | <input type="checkbox"/> |
| _____                                                                                          | <input type="checkbox"/>           | <input type="checkbox"/> | <input type="checkbox"/>                                                                      | <input type="checkbox"/>                                                                    | <input type="checkbox"/> | _____                  | <input type="checkbox"/>                                | <input type="checkbox"/> | <input type="checkbox"/> | <input type="checkbox"/> |

**4. Self Help Practices**

| Have you used any of the following self-help practices in the last 12 months? | Yes<br>No                                         | Number of times you used this practice in the last 3 months? | Please indicate the <i>main</i> reason that applies to your <i>last</i> use of the self-help practice (Check only one). |                                                                                             |                          |                                         | How helpful did you find this self-help practice? (Check only one)<br>Very<br>Somewhat<br>Not at all<br>Don't know |
|-------------------------------------------------------------------------------|---------------------------------------------------|--------------------------------------------------------------|-------------------------------------------------------------------------------------------------------------------------|---------------------------------------------------------------------------------------------|--------------------------|-----------------------------------------|--------------------------------------------------------------------------------------------------------------------|
|                                                                               |                                                   |                                                              | For an acute illness/condition, one that lasted less than one month                                                     | To treat a long-term health condition (one that lasted more than one month) or its symptoms | To improve well-being    | Other (Please specify the other reason) |                                                                                                                    |
| <b>Meditation</b>                                                             | <input type="checkbox"/> <input type="checkbox"/> | _____                                                        | <input type="checkbox"/>                                                                                                | <input type="checkbox"/>                                                                    | <input type="checkbox"/> | _____                                   | <input type="checkbox"/> <input type="checkbox"/> <input type="checkbox"/> <input type="checkbox"/>                |
| <b>Yoga</b>                                                                   | <input type="checkbox"/> <input type="checkbox"/> | _____                                                        | <input type="checkbox"/>                                                                                                | <input type="checkbox"/>                                                                    | <input type="checkbox"/> | _____                                   | <input type="checkbox"/> <input type="checkbox"/> <input type="checkbox"/> <input type="checkbox"/>                |
| <b>Qigong</b>                                                                 | <input type="checkbox"/> <input type="checkbox"/> | _____                                                        | <input type="checkbox"/>                                                                                                | <input type="checkbox"/>                                                                    | <input type="checkbox"/> | _____                                   | <input type="checkbox"/> <input type="checkbox"/> <input type="checkbox"/> <input type="checkbox"/>                |
| <b>Tai Chi</b>                                                                | <input type="checkbox"/> <input type="checkbox"/> | _____                                                        | <input type="checkbox"/>                                                                                                | <input type="checkbox"/>                                                                    | <input type="checkbox"/> | _____                                   | <input type="checkbox"/> <input type="checkbox"/> <input type="checkbox"/> <input type="checkbox"/>                |
| <b>Relaxation techniques</b>                                                  | <input type="checkbox"/> <input type="checkbox"/> | _____                                                        | <input type="checkbox"/>                                                                                                | <input type="checkbox"/>                                                                    | <input type="checkbox"/> | _____                                   | <input type="checkbox"/> <input type="checkbox"/> <input type="checkbox"/> <input type="checkbox"/>                |
| <b>Visualization</b>                                                          | <input type="checkbox"/> <input type="checkbox"/> | _____                                                        | <input type="checkbox"/>                                                                                                | <input type="checkbox"/>                                                                    | <input type="checkbox"/> | _____                                   | <input type="checkbox"/> <input type="checkbox"/> <input type="checkbox"/> <input type="checkbox"/>                |
| <b>Attended traditional healing ceremony</b>                                  | <input type="checkbox"/> <input type="checkbox"/> | _____                                                        | <input type="checkbox"/>                                                                                                | <input type="checkbox"/>                                                                    | <input type="checkbox"/> | _____                                   | <input type="checkbox"/> <input type="checkbox"/> <input type="checkbox"/> <input type="checkbox"/>                |
| <b>Praying for own health</b>                                                 | <input type="checkbox"/> <input type="checkbox"/> | _____                                                        | <input type="checkbox"/>                                                                                                | <input type="checkbox"/>                                                                    | <input type="checkbox"/> | _____                                   | <input type="checkbox"/> <input type="checkbox"/> <input type="checkbox"/> <input type="checkbox"/>                |
| <b>Specified option:</b><br>_____                                             | <input type="checkbox"/> <input type="checkbox"/> | _____                                                        | <input type="checkbox"/>                                                                                                | <input type="checkbox"/>                                                                    | <input type="checkbox"/> | _____                                   | <input type="checkbox"/> <input type="checkbox"/> <input type="checkbox"/> <input type="checkbox"/>                |
| <b>Other (please specify):</b><br>_____                                       | <input type="checkbox"/> <input type="checkbox"/> | _____                                                        | <input type="checkbox"/>                                                                                                | <input type="checkbox"/>                                                                    | <input type="checkbox"/> | _____                                   | <input type="checkbox"/> <input type="checkbox"/> <input type="checkbox"/> <input type="checkbox"/>                |

# Section 5 – Biological values

(Authors' translation from French)

Identification code : \_\_\_\_\_

Date : \_\_\_\_\_

We would like to collect some biological data from your medical records, would you agree?

Agree

Refuse

Clinical data from medical records:

Protein concentration : \_\_\_\_\_

Hemoglobin (g/dl) : \_\_\_\_\_

Creatine : \_\_\_\_\_

Glomerular filtration rate : \_\_\_\_\_

Weight : \_\_\_\_\_ kg

Size : \_\_\_\_\_ cm
